# Supplementary material for: Aqueous foams stabilized by temperature-sensitive hairy polymer particles
Source: Royal Society of Chemistry journal article supplement (doi:10.1039/c5sm02187a), 2015-01-01
Supplement: c5sm02187a1.pdf [file c5sm02187a1.pdf]

## Electronic Supplementary Information

*Soft Matter* manuscript

‘Aqueous Foams Stabilized by Temperature-Sensitive Hairy Polymer Particles’

by S. Nakayama *et al.*

Corresponding author:

Dr. Syuji Fujii; syuji.fujii@oit.ac.jp

### *PDEA chain occupied molecular area at the particle surface*

For the calculation of PDEA chain occupied molecular area at the particle surface, the values shown below were used: a diameter of PDEA-PS particles, 410 nm; PDEA loading on the PDEA-PS particles, 2.78 wt%; a molecular weight of PDEA hair ( $n=60$ ), 11100; a density of PS, 1.06 g/cm<sup>3</sup>. Weight and surface area of single PDEA-PS particle are calculated to be  $3.83 \times 10^{-14}$  g and  $5.28 \times 10^{-13}$  m<sup>2</sup>, respectively. Weight and number of PDEA hairs in the PDEA-PS particle are calculated to be  $1.06 \times 10^{-15}$  g and 57651. These values lead to PDEA chain occupied molecular area at the particle surface and square root of the occupied molecular area of 9.16 nm<sup>2</sup> and 3.03 nm, respectively.

### *Calculation for diameter of gyration of the PDEA hair*

The diameter of gyration of the PDEA hair was calculated using the equation shown below,

$$D = 2\sqrt{\frac{na^2}{6}}$$

where  $n$  and  $a$  are bond number and bond length, respectively.

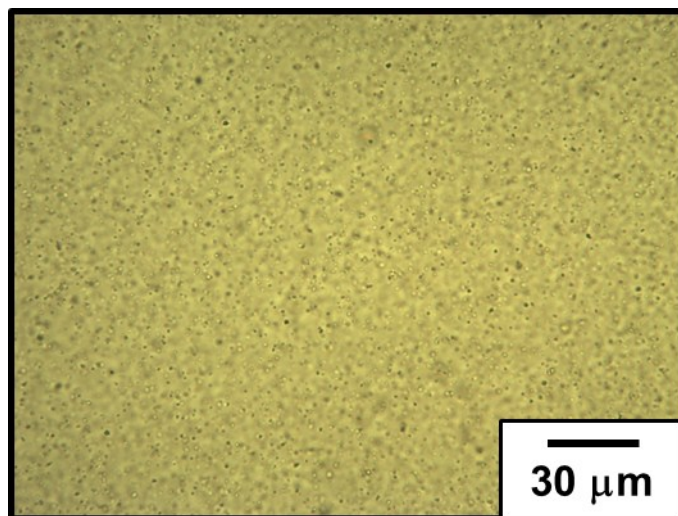

**Figure S1.** OM image of PDEA-PS particles dispersed in aqueous buffer (pH 4.01) at 25 °C.

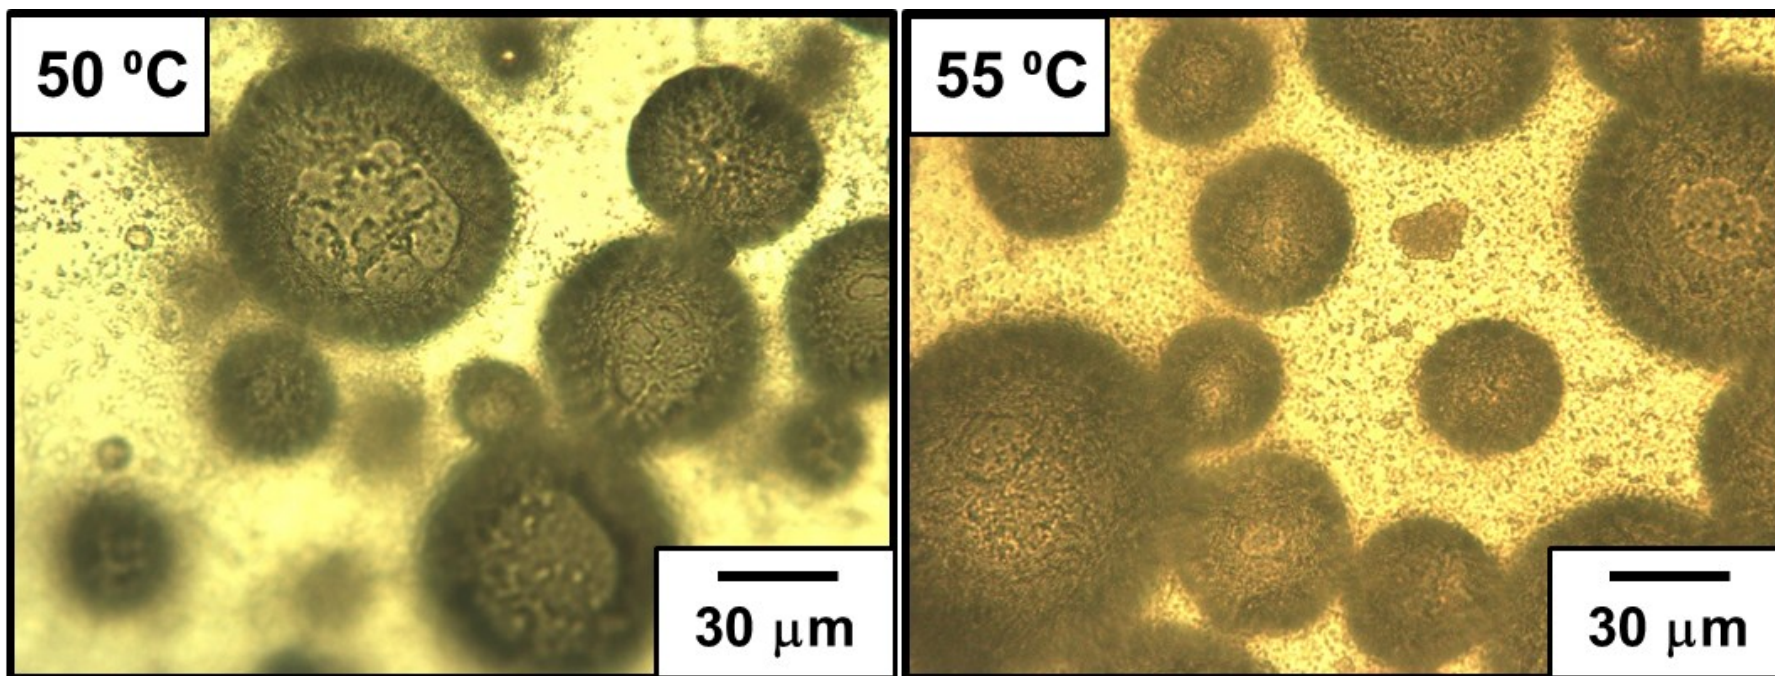

**Figure S2.** OM images of foams stabilized with PDEA-PS particles (10 wt%, pH 6.86) prepared at temperatures of 50 °C and 55 °C. Flocs can be observed in aqueous media and on the bubble surfaces.
